# Supplementary material for: Factors Influencing Instructors’ Adoption and Continued Use of Computing Science Technologies: A Case Study in the Context of Cell Collective
Source: Atypon-hosted journal article supplement (doi:10.1187/cbe.22-11-0239), 2023-06-06
Supplement: combinedsupmats.pdf [file combinedsupmats.pdf]

# Supplemental Material

*CBE—Life Sciences Education*

Song *et al.*

## Supplemental Materials

### Measurement items for each construct employed in the research model

#### Perceived Usefulness-Teaching

- (PU1\_T) Using Cell Collective in my teaching enables me to accomplish tasks more quickly.
- (PU2\_T) Using Cell Collective improves my teaching performance.
- (PU3\_T) Using Cell Collective in my teaching increases my productivity.
- (PU4\_T) Using Cell Collective enhances my effectiveness in teaching.
- (PU5\_T) Using Cell Collective makes it easier to do my teaching.

#### Perceived Usefulness-Learning

- (PU1\_L) Using Cell Collective improves my students' learning performance.
- (PU2\_L) Using Cell Collective enhances my students' understanding of biological processes.
- (PU3\_L) Using Cell Collective increases my students' productivity in learning biological processes.
- (PU4\_L) Using Cell Collective makes it easier for my students to learn biological processes.

#### Perceived Ease of Use-Teaching

- (PE1\_T) Learning to use Cell Collective is easy for me.
- (PE2\_T) I find it easy to get Cell Collective to do what I want it to do.
- (PE3\_T) I find Cell Collective to be flexible to interact with.
- (PE4\_T) It is easy for me to become skillful at using Cell Collective.
- (PE5\_T) My interaction with Cell Collective is clear and understandable.

#### Perceived Ease of Use - Student

- (PE1\_L) Learning to use Cell Collective is easy for my students.
- (PE2\_L) My students find it easy to get Cell Collective to do what they want it to do.
- (PE3\_L) My students find Cell Collective to be flexible to interact with.
- (PE4\_L) It is easy for my students to become skillful at using Cell Collective.
- (PE5\_L) My students' interaction with Cell Collective is clear and understandable.

#### Attitude toward Behavior

- (ATT1) It is a good idea to use Cell Collective in teaching biological processes.
- (ATT2) It is a wise idea to use Cell Collective in teaching biological processes.
- (ATT3) It is pleasant to use Cell Collective in teaching biological processes.

- (ATT4) I like the idea of using Cell Collective in teaching biological processes.

**Behavioral Intention to Continue to Use or Use More**

- (BI1) I intend to use Cell Collective more intensively for my teaching of biological processes.
- (BI2) I intend to explore more Cell Collective features/functions for my teaching of biological processes.
- (BI3) I intend to use Cell Collective to do my teaching of biological processes whenever it has a feature to help me perform it.
- (BI4) I intend to use Cell Collective in as many cases/occasions as possible.

## Raw Data

| PU1<br>_T | PU2<br>_T | PU3<br>_T | PU4<br>_T | PU5<br>_T | PU1<br>_L | PU2<br>_L | PU3<br>_L | PU4<br>_L | PE1<br>_T | PE2<br>_T | PE3<br>_T | PE4<br>_T | PE5<br>_T | PE1<br>_L | PE2<br>_L | PE3<br>_L | PE4<br>_L | PE5<br>_L | ATT1 | ATT2 | ATT3 | ATT4 | BI1 | BI2 | BI3 | BI4 |   |
|-----------|-----------|-----------|-----------|-----------|-----------|-----------|-----------|-----------|-----------|-----------|-----------|-----------|-----------|-----------|-----------|-----------|-----------|-----------|------|------|------|------|-----|-----|-----|-----|---|
| 4         | 4         | 5         | 5         | 5         | 7         | 7         | 7         | 7         | 6         | 5         | 6         | 6         | 6         | 5         | 5         | 5         | 5         | 5         | 6    | 4    | 4    | 5    | 4   | 5   | 6   | 2   |   |
| 7         | 7         | 7         | 7         | 7         | 7         | 6         | 6         | 7         | 7         | 7         | 7         | 7         | 7         | 6         | 6         | 7         | 7         | 7         | 7    | 7    | 7    | 7    | 6   | 6   | 6   | 6   |   |
| 5         | 6         | 5         | 6         | 6         | 6         | 6         | 6         | 6         | 5         | 5         | 4         | 6         | 6         | 5         | 5         | 5         | 5         | 6         | 6    | 6    | 5    | 6    | 6   | 6   | 6   | 6   |   |
| 4         | 5         | 5         | 6         | 6         | 5         | 6         | 6         | 5         | 4         | 4         | 4         | 4         | 4         | 4         | 4         | 5         | 4         | 5         | 5    | 5    | 5    | 6    | 5   | 5   | 5   | 3   |   |
|           |           |           |           |           | 7         | 7         | 7         | 7         | 7         | 7         | 7         | 7         | 7         |           |           |           |           |           | 7    | 7    | 7    | 7    | 7   | 7   | 7   | 7   |   |
| 5         | 6         | 6         | 7         | 5         | 6         | 7         | 7         | 7         | 6         | 5         | 6         | 6         | 5         |           |           |           |           |           | 7    | 7    | 7    | 7    | 5   | 5   | 5   | 5   |   |
| 6         | 6         | 6         | 7         | 7         | 6         | 7         | 6         | 7         | 3         | 3         | 4         | 3         | 4         | 5         | 3         | 4         | 3         | 5         | 7    | 7    | 5    | 7    | 3   | 5   | 5   | 5   |   |
| 6         | 6         | 6         | 6         | 6         | 6         | 6         | 6         | 6         | 5         | 5         | 5         | 4         | 5         | 3         | 3         | 3         | 4         | 3         | 6    | 6    | 6    | 6    | 4   | 6   | 6   | 5   |   |
| 6         | 6         | 6         | 6         | 6         | 7         | 7         | 7         | 7         | 7         | 7         | 7         | 7         |           | 7         | 7         | 7         | 7         | 7         | 7    | 7    | 7    | 7    | 7   | 7   | 7   | 7   |   |
| 2         | 4         | 4         | 3         | 4         |           |           |           | 3         | 5         | 4         | 4         | 4         | 3         | 1         | 1         | 1         | 1         | 1         | 5    | 4    | 4    | 5    | 1   | 1   | 1   | 1   |   |
| 4         | 4         | 3         | 6         | 5         | 5         | 6         |           | 5         | 5         | 5         |           |           |           | 5         | 4         |           |           |           | 6    |      | 4    | 6    | 4   | 4   | 2   | 3   |   |
| 6         | 6         | 5         | 7         | 6         | 6         | 7         | 6         | 7         | 7         | 6         | 6         | 6         | 6         | 6         | 5         | 6         | 6         | 6         | 6    | 6    | 6    | 6    | 6   | 6   | 6   | 6   |   |
| 4         | 6         | 5         | 6         | 4         | 6         | 6         | 5         | 5         | 5         | 5         | 5         | 5         | 5         | 5         | 5         | 5         | 4         | 5         | 6    | 6    | 6    | 7    | 6   | 6   | 5   | 5   |   |
| 5         | 4         | 4         | 6         | 6         | 6         | 6         | 3         | 3         | 5         | 3         | 5         | 5         | 4         | 3         | 3         | 3         | 3         | 4         | 7    | 6    | 3    | 6    | 6   | 6   | 6   | 6   |   |
| 3         | 6         | 4         | 7         | 3         | 6         | 6         | 6         | 6         | 5         | 5         | 5         | 5         | 5         | 5         |           | 5         |           | 5         | 7    | 7    | 6    | 7    | 4   | 5   | 6   | 5   |   |
| 7         | 7         | 7         | 7         | 7         | 7         | 7         | 7         | 7         | 3         | 6         | 7         | 6         | 7         | 6         | 6         | 2         | 2         | 6         | 7    | 7    | 7    | 7    | 4   | 5   | 7   | 7   |   |
|           |           |           |           |           | 6         | 7         | 6         | 6         | 6         | 6         | 5         | 6         | 6         |           |           |           |           |           | 6    | 6    | 5    | 6    | 6   | 7   | 6   | 6   |   |
| 2         | 4         | 3         | 6         | 3         | 7         | 7         |           | 5         | 5         | 6         | 5         | 6         | 6         | 5         | 5         | 4         | 5         | 5         | 7    | 7    | 5    | 7    | 3   | 6   | 4   | 2   |   |
| 4         | 5         | 4         | 5         | 5         | 6         | 6         | 4         | 6         | 6         | 4         | 5         | 6         | 6         | 5         | 5         | 4         | 5         | 4         | 6    | 5    | 5    | 6    | 5   | 5   | 5   | 5   |   |
|           |           |           |           |           | 4         | 5         | 5         | 4         | 5         | 3         | 6         | 5         | 4         | 4         | 4         | 4         | 5         | 4         | 4    | 4    | 4    | 4    | 5   | 4   | 5   | 5   | 4 |
| 3         | 5         | 4         | 6         | 5         | 6         | 6         | 6         | 6         | 5         | 3         | 5         | 3         | 4         | 5         |           |           |           |           | 6    | 6    | 5    | 6    | 4   | 5   | 6   | 3   |   |
| 5         | 5         | 5         | 5         | 5         | 5         | 5         | 5         | 5         | 6         | 6         | 6         | 6         | 6         | 5         | 5         | 4         | 4         | 3         | 6    | 6    | 4    | 6    | 5   | 6   | 5   | 4   |   |
| 5         | 5         | 5         | 6         | 6         | 7         | 7         | 7         | 7         | 7         | 7         | 5         | 6         | 7         | 5         | 5         | 5         | 5         | 5         | 6    | 4    | 4    | 6    | 5   | 5   | 6   | 4   |   |
| 4         | 5         | 4         | 5         | 5         | 5         | 6         | 4         | 5         | 5         | 5         | 5         | 3         | 2         | 3         | 3         | 4         | 3         | 4         | 6    | 6    | 5    | 6    | 5   | 5   | 5   | 5   |   |
| 3         | 3         | 2         | 2         | 2         | 3         | 2         | 2         | 4         | 6         | 5         | 5         | 6         | 5         | 2         | 2         | 2         | 2         | 2         | 4    | 4    | 4    | 5    | 3   | 3   | 3   | 3   |   |
| 3         | 4         | 4         | 5         | 4         | 6         | 6         | 4         | 3         | 3         | 5         | 5         | 5         | 4         | 3         |           |           |           | 3         | 7    | 4    | 5    | 7    | 5   | 5   | 5   | 4   |   |
| 1         | 1         | 1         | 6         | 1         | 6         | 7         |           | 1         | 6         | 6         | 2         | 4         | 6         | 2         | 2         | 2         | 2         | 2         | 5    | 6    | 1    | 4    | 1   | 1   | 1   | 1   |   |

|   |   |   |   |   |   |   |   |   |   |   |   |   |   |   |   |   |   |   |   |   |   |   |   |   |   |   |   |
|---|---|---|---|---|---|---|---|---|---|---|---|---|---|---|---|---|---|---|---|---|---|---|---|---|---|---|---|
| 5 | 6 | 5 | 6 | 5 | 7 | 6 | 4 | 6 | 7 | 6 | 6 | 6 | 6 | 5 | 3 | 5 | 6 | 5 | 7 | 6 | 5 | 6 | 5 | 6 | 6 | 3 |   |
| 6 | 5 | 5 | 6 | 6 | 6 | 6 | 5 | 6 | 7 | 6 | 5 | 6 | 6 | 6 | 5 | 5 | 6 | 6 | 7 | 7 | 6 | 7 | 3 | 5 | 5 | 3 |   |
| 5 | 5 | 5 | 5 | 5 | 6 | 6 | 6 | 6 | 4 | 5 | 5 | 4 | 4 | 4 | 4 | 5 | 4 | 4 | 6 | 7 | 5 | 6 | 4 | 5 | 4 | 3 |   |
| 6 | 6 | 4 | 7 | 6 | 7 | 7 | 6 | 6 | 7 | 6 | 5 | 5 | 6 | 6 | 6 | 6 | 5 | 6 | 7 | 7 | 6 | 6 | 4 | 4 | 3 | 3 |   |
| 3 | 5 | 4 | 4 | 5 | 5 | 5 | 4 | 5 | 6 | 3 | 6 | 4 | 6 |   |   |   |   |   | 6 | 6 | 5 | 7 | 6 | 6 | 6 | 5 |   |
| 2 | 6 | 3 | 6 | 5 | 7 | 7 | 7 | 7 | 7 | 7 | 7 | 7 | 7 | 3 | 7 | 7 | 7 | 7 | 7 | 7 | 7 | 7 |   |   |   |   |   |
| 1 | 2 | 1 | 1 | 1 | 3 | 3 | 4 | 4 | 3 | 3 | 5 | 5 | 3 | 3 | 3 | 3 | 3 | 3 | 4 | 4 | 3 | 5 | 3 | 5 | 5 | 2 |   |
| 5 | 4 | 4 | 6 | 6 |   | 5 |   | 6 | 5 | 5 | 6 | 5 | 5 | 5 | 5 | 5 | 6 | 6 | 7 | 6 | 6 | 6 | 6 | 6 | 6 | 6 |   |
|   |   |   |   |   | 6 | 6 | 6 | 6 | 6 | 6 | 5 | 6 | 5 |   |   |   |   |   | 6 | 6 | 5 | 6 | 6 | 6 | 6 | 6 |   |
| 5 | 7 | 7 | 7 | 5 |   |   |   | 6 | 6 | 5 | 4 | 5 | 5 | 6 | 6 |   | 6 | 6 | 7 | 7 | 6 | 7 | 7 | 7 | 6 | 6 |   |
| 3 | 4 | 4 | 5 | 3 | 5 | 5 | 5 | 5 | 5 | 3 | 1 | 3 | 3 | 5 | 3 | 3 | 2 | 2 | 6 | 6 | 2 | 7 | 4 | 5 | 5 | 4 |   |
| 3 | 4 | 3 | 5 | 3 | 5 | 5 | 4 | 3 | 3 | 3 | 3 | 4 | 3 | 3 | 3 | 3 | 3 | 3 | 5 | 5 | 4 | 6 | 4 | 5 | 5 | 4 |   |
|   |   |   |   |   |   |   |   |   | 6 | 5 | 4 | 4 | 5 |   |   |   |   |   | 6 | 6 | 4 | 6 | 5 | 7 | 4 | 4 |   |
| 7 | 5 | 5 | 6 | 7 | 6 | 7 | 4 | 6 | 6 | 5 | 6 | 4 | 6 | 6 | 5 | 5 |   |   | 5 | 5 | 4 | 6 | 6 | 6 | 6 | 2 |   |
| 7 | 7 | 7 | 7 | 7 | 6 | 6 | 6 | 6 | 5 | 5 | 6 | 5 | 6 | 4 | 4 | 4 | 4 | 4 | 4 | 4 | 4 | 4 | 4 | 3 | 3 | 3 | 3 |
